# Supplementary material
Source: Elsevier journal article supplement (https://www.sciencedirect.com/science/article/pii/S2341192918300842)
Supplement: mmc1 [file S2341192918300842:mmc1.pdf]

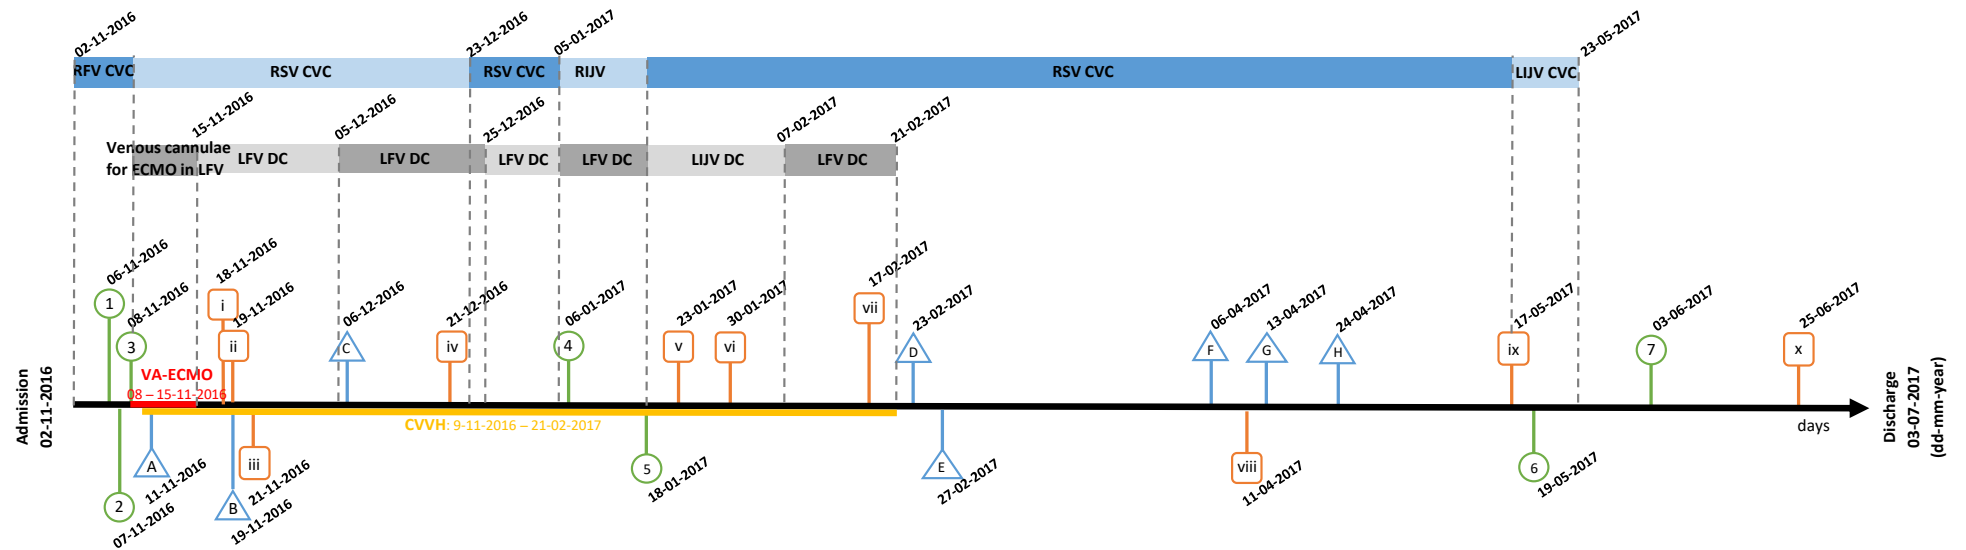

**Legend:**

- |                                     |                                       |                                                            |                            |                         |
|-------------------------------------|---------------------------------------|------------------------------------------------------------|----------------------------|-------------------------|
| CT: computed tomography             | CVC: central venous catheter          | CVVH: continuous veno-venous hemofiltration                | DC: Dialysis catheter      | LFV: left femoral vein  |
| LIJ V: left internal jugular vein   | RIJ V: right internal jugular vein    | RFV: right femoral vein                                    | RSV: right subclavian vein | SVC: superior vena cava |
| TTE: transthoracic echocardiography | TEE: transesophageal echocardiography | VA-ECMO: veno-arterial extracorporeal membrane oxygenation |                            |                         |

- ① **Necrotizing pneumonia** by *Pseudomonas aeruginosa*
- ② **Septic shock with multiorgan failure** (cardiovascular, respiratory, renal, hepatic and hematologic).
- ③ **Pulseless electrical activity cardiac arrest:** returned to spontaneous circulation with subsequent cardiogenic shock and poor perfusion of distal limbs.
- ④ **Stage IV sacral pressure ulcer**
- ⑤ **Methicillin-resistant *Staphylococcus aureus* bacteremia;** Isolation of *Staphylococcus epidermidis* from the tip of the internal jugular CVC
- ⑥ **Cardiac failure** after removal of mediastinal chest drains
- ⑦ ***Pseudomonas aeruginosa* bacteremia with septic shock**

- △ A **TTE:** "Preserved right ventricular systolic function (RVSF), left ventricular ejection fraction (LVEF) <10%.
- △ B **Chest CT:** "right pneumothorax and emphysematous bullae on upper lobe; right and left moderate pleural effusions". Right thoracic empyema confirmed by chest echo guided aspiration.
- △ C **TTE:** "Preserved RVSF, LVEF 55%".
- △ D **Chest CT:** "irregular mass at the tip of the CVC, measuring ~55x7mm and extending from the superior vena cava to the right atrium".  
**TTE:** "new ~60x21mm mass in right atrium".
- △ E **TEE:** "large polyglobulated mass, ~60x26mm, consistent with an organized thrombus, adherent to the CVC tip and floating in RA, without obstruction of systemic venous flow or tricuspid valve."
- △ F **TEE:** "similar to previous exam"
- △ G **TEE:** "similar to previous exam"
- △ H **Chest CT:** "calcified CRAT of 80x16mm".

- i **Common and superficial right femoral artery raffia by iatrogenic pseudoaneurysm.**
- ii **Insertion of two right chest tube drains:** an apical for pneumothorax, removed on 22-12-2016; and a basal for empyema, until 28-12-2016.
- iii **Left chest drainage** of pleural effusion for 28 days
- iv **Percutaneous tracheostomy**
- v **Infracondilian amputation** of left inferior limb and **distal trans-metacarpal amputation** of left hand.
- vi **Infracondilian amputation** of right inferior limb and **proximal interphalangeal amputation** of all right hand fingers.
- vii **Right posterolateral thoracotomy:** incomplete decortication, due to technical difficulties which led to a successful ventilation of the lower lobe, but leaving behind significant fibrosis of upper and middle lobes.
- viii **Thrombolysis with alteplase**
- ix **Extracorporeal circulating cardiac surgery**
- x **Cranioplasty**
